# Supplementary material for: Enzyme-Catalyzed Polymerization of Kraft Lignin from Eucalyptus globulus: Comparison of Bacterial and Fungal Laccases Efficacy
Source: MDPI journal article supplement (doi:10.3390/polym15030513), 2023-01-18
Supplement: s1 [file s1]

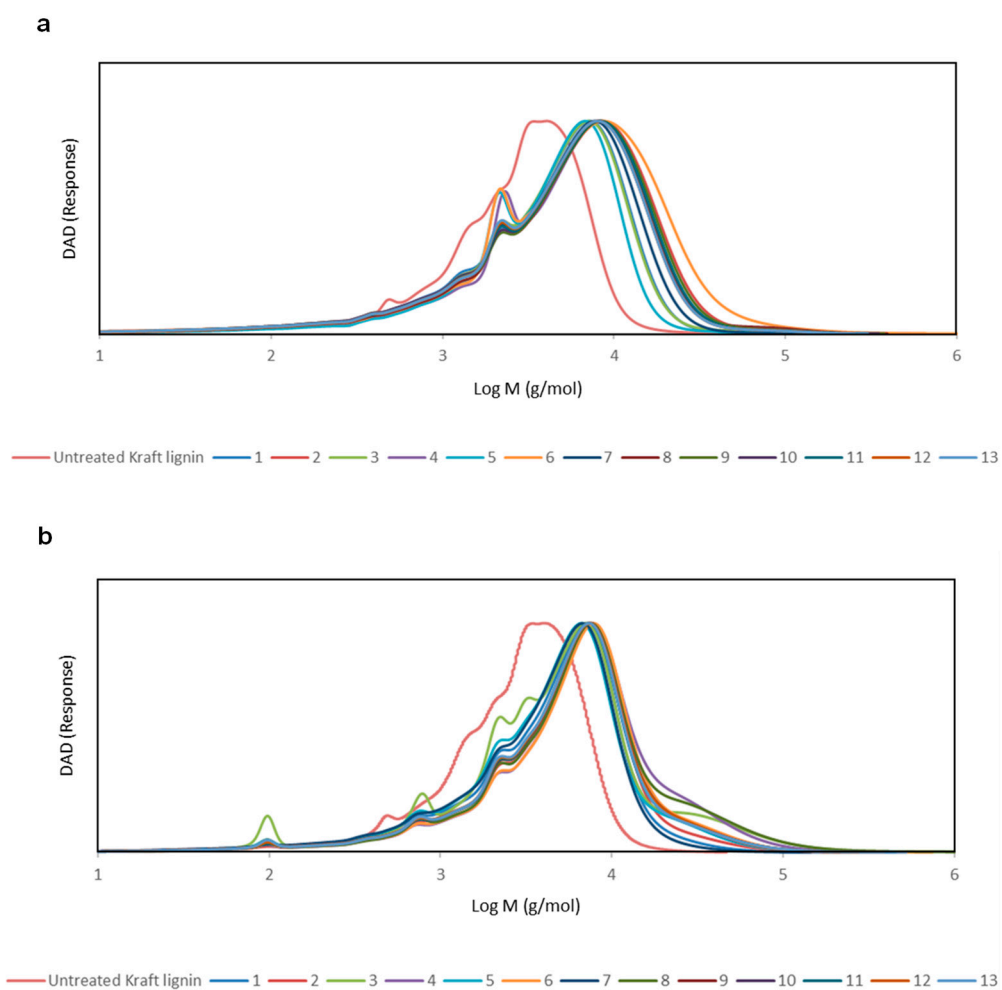

**Figure S1.** Molecular weight distributions of the resulting treated lignins with MtL (**a**) and SiLA (**b**) laccases.

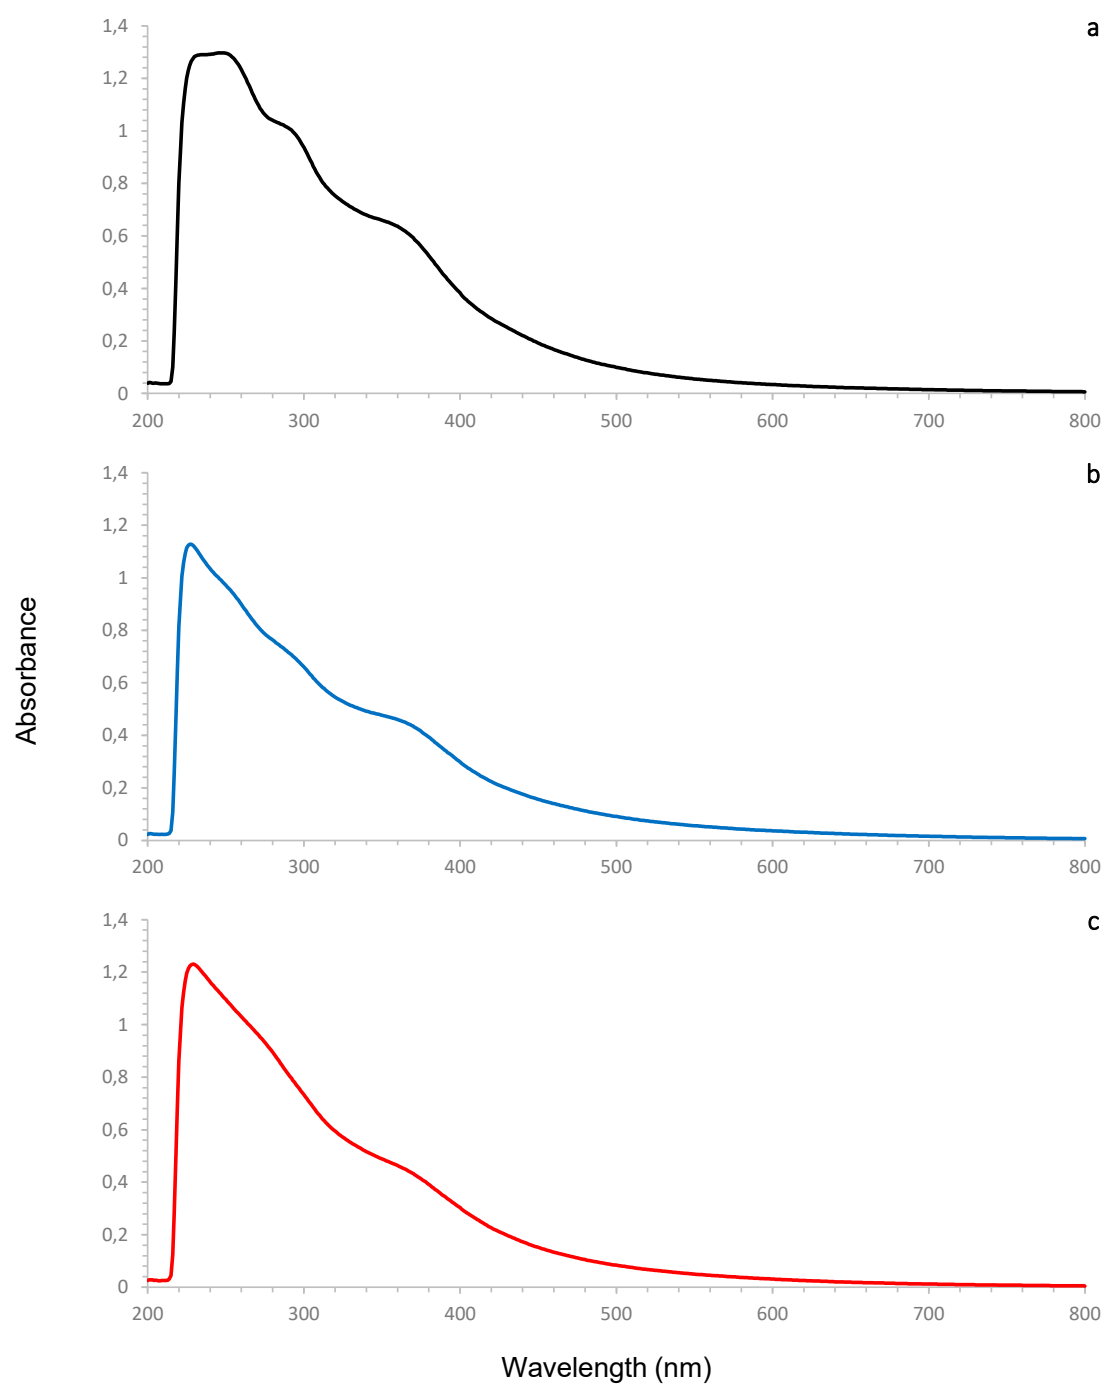

Figure S2. UV-Vis spectra,  $\lambda$  200-800 nm, of the untreated lignin (**a**) and of the resulting treated lignins with MtL (**b**) and SiLA (**c**) laccases.

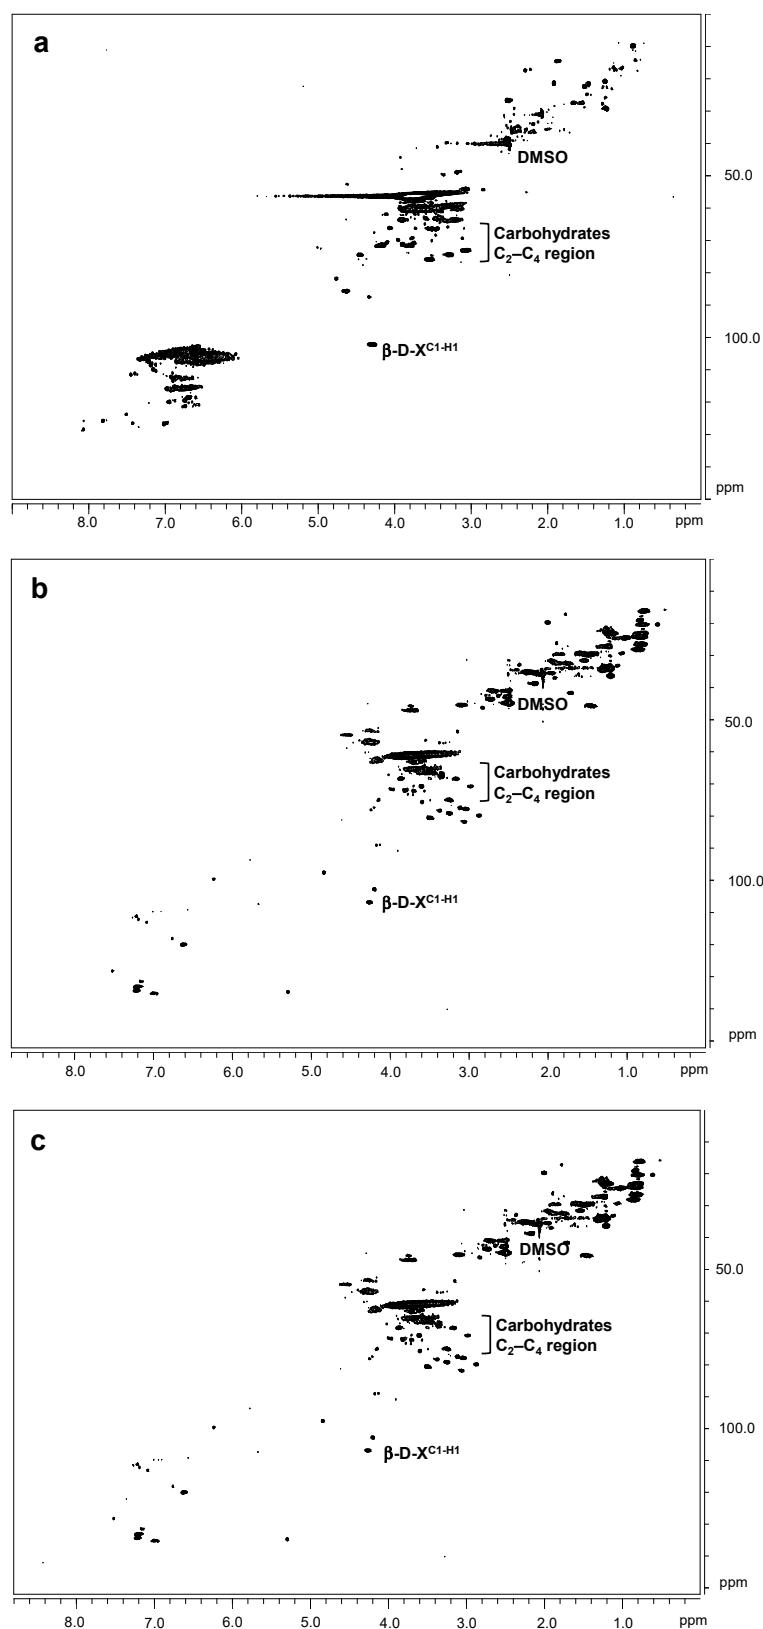

**Figure S3.** HSQC 2D-NMR whole spectra,  $\delta_{\text{C}}/\delta_{\text{H}}$  0.0–150.0/0.0–9.0 ppm, of the untreated lignin (a) and of the resulting treated lignins with MtL (b) and SiLA (c) laccases.

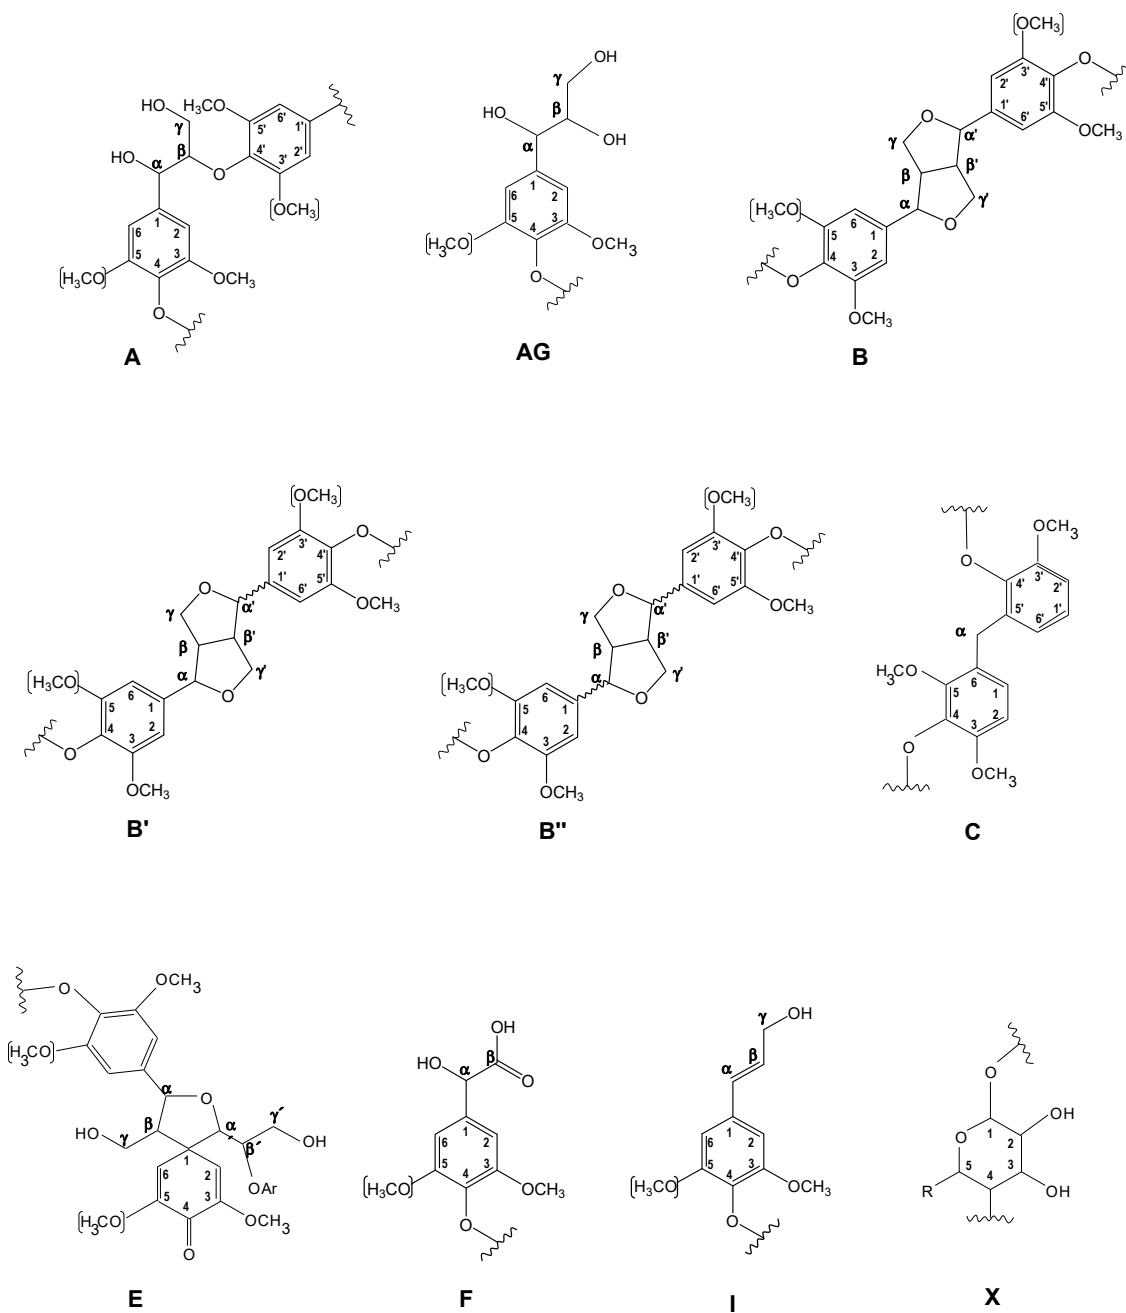

**Figure S4.** Main lignin and carbohydrate substructures identified in aliphatic oxygenated region of the untreated Kraft lignin and of the resulting treated lignins with MtL and SiLA laccases.

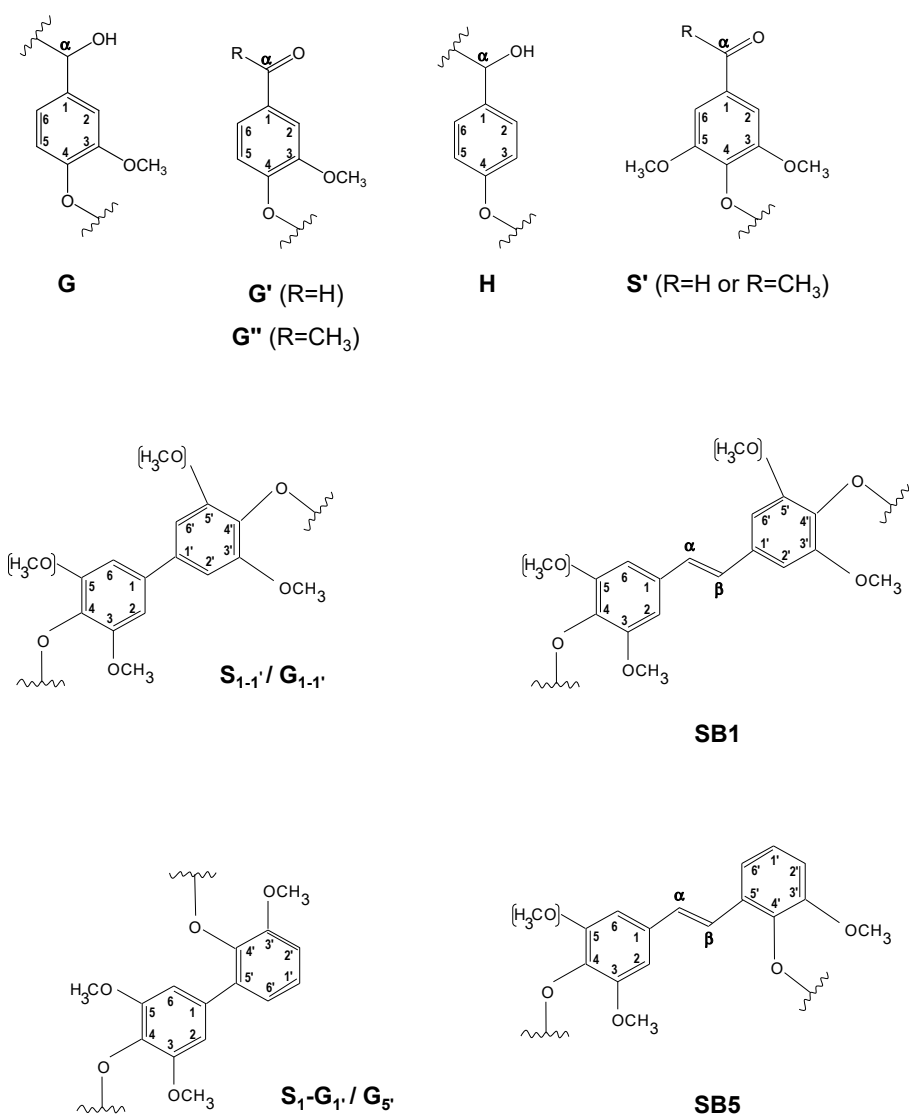

**Figure S5.** Main lignin substructures identified in aromatic region of the untreated Kraft lignin and of the resulting treated lignins with MtL and SiLA laccases.

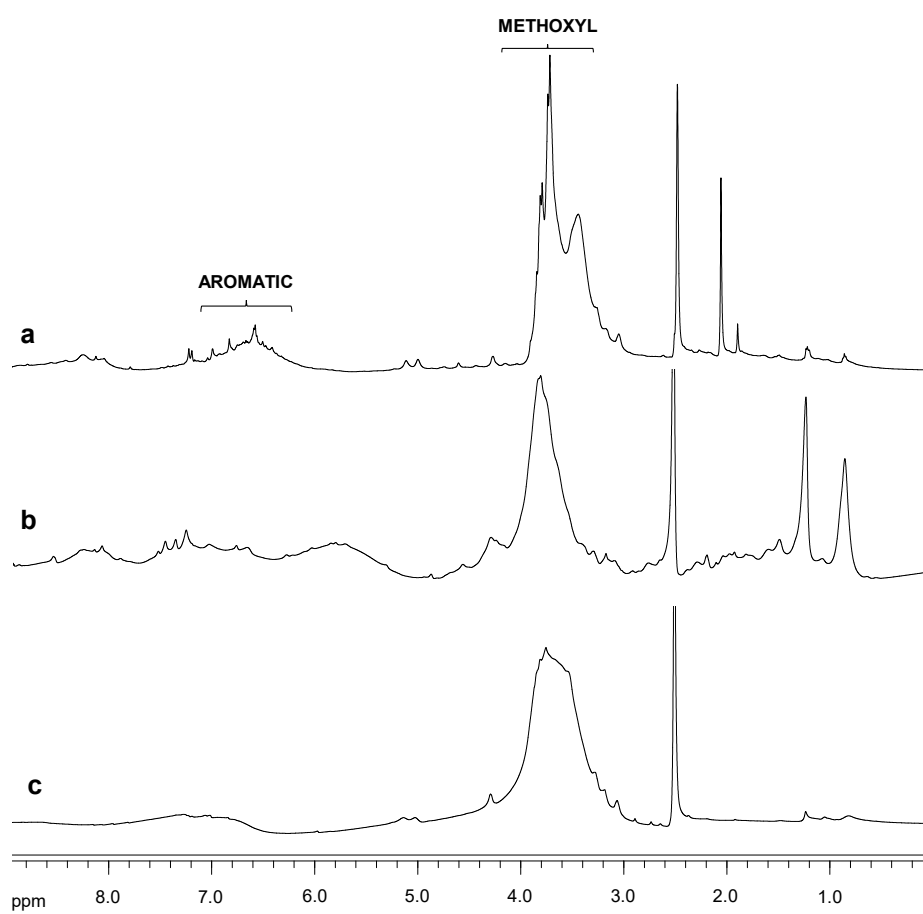

**Figure S6.** <sup>1</sup>H NMR spectra, δ<sub>H</sub> 0.0–9.0 ppm, of the untreated Kraft lignin (a) and of the resulting treated lignins with MtL (b) and SiLA (c) laccases.

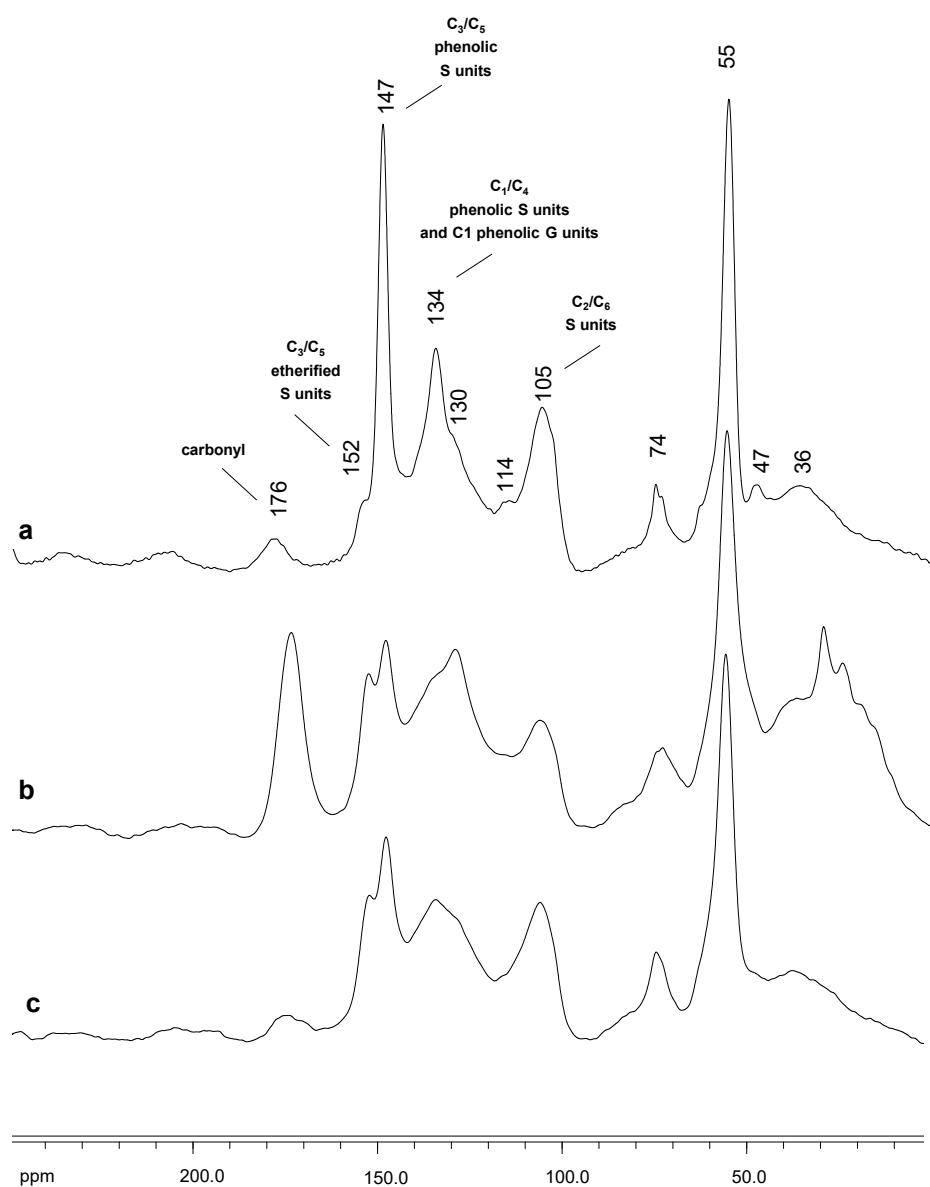

**Figure S7.**  $^{13}\text{C}$  NMR spectra,  $\delta_{\text{C}}$  0.0–250.0 ppm, of the untreated Kraft lignin (a) and of the resulting treated lignins with MtL (b) and SiLA (c) laccases.

**Table S1.** Weight average (Mw) and number-average (Mn) molecular weights and polydispersity (Mw/Mn) of the untreated Kraft lignin and of the resulting treated lignins with MtL and SiLA laccases. Mw and Mn are given in Da.

|                          | Sample | Mw     | Mn     | D      |
|--------------------------|--------|--------|--------|--------|
| Starting material        |        | 3530.4 | 526.99 | 6.6993 |
|                          | 1      | 6054   | 517.58 | 11.697 |
|                          | 2      | 8566.7 | 474.62 | 18.022 |
|                          | 3      | 6452   | 548.4  | 11.765 |
|                          | 4      | 8162.7 | 330.04 | 24.732 |
|                          | 5      | 5580   | 668.5  | 8.3471 |
|                          | 6      | 10865  | 394.97 | 27.509 |
| Lignin treated with MtL  | 7      | 6715.6 | 540.2  | 12.431 |
|                          | 8      | 8802.5 | 665.11 | 13.235 |
|                          | 9      | 8599.8 | 494.04 | 17.407 |
|                          | 10     | 7963.6 | 530.15 | 15.021 |
|                          | 11     | 8220.4 | 597.91 | 13.749 |
|                          | 12     | 7923.4 | 620.81 | 12.763 |
|                          | 13     | 7836.5 | 435.39 | 17.999 |
|                          | 1      | 6177.9 | 701.67 | 8.8047 |
|                          | 2      | 7537.4 | 849.88 | 8.8689 |
|                          | 3      | 11248  | 667.12 | 16.861 |
|                          | 4      | 10911  | 846    | 12.897 |
|                          | 5      | 7335.3 | 792.61 | 9.2547 |
|                          | 6      | 9074.1 | 746.65 | 12.153 |
| Lignin treated with SiLA | 7      | 5558.1 | 557.57 | 9.9683 |
|                          | 8      | 12545  | 790.44 | 15.871 |
|                          | 9      | 8391.3 | 710.59 | 11.809 |
|                          | 10     | 8333.8 | 682.95 | 12.203 |
|                          | 11     | 8373.1 | 714.31 | 11.722 |
|                          | 12     | 8346   | 708.62 | 11.778 |
|                          | 13     | 8339.9 | 720.63 | 11.573 |

**Table S2.** Main assignments of untreated and laccase-treated Kraft lignins FTIR bands

| Wavenumber            | Characteristic groups                                 |
|-----------------------|-------------------------------------------------------|
| 1715 cm <sup>-1</sup> | C=O stretching for unconjugated linkages              |
| 1650 cm <sup>-1</sup> | C=O stretching for conjugated linkages                |
| 1610 cm <sup>-1</sup> | Vibrations of the aromatic ring                       |
| 1515 cm <sup>-1</sup> | Vibrations of the aromatic ring                       |
| 1455 cm <sup>-1</sup> | C-H asymmetric vibrations and deformations            |
| 1415 cm <sup>-1</sup> | Vibrations of the aromatic ring                       |
| 1315 cm <sup>-1</sup> | Aromatic ring breathing (S and G condensed units)     |
| 1270 cm <sup>-1</sup> | Aromatic ring breathing with C=O stretching (G units) |



|                       |                                                                     |
|-----------------------|---------------------------------------------------------------------|
| 1220 cm <sup>-1</sup> | Aromatic ring breathing with C–C, C–O, and C=O stretching (G units) |
| 1115 cm <sup>-1</sup> | C–H bond deformation (S units)                                      |
| 1025 cm <sup>-1</sup> | C–H bond deformation (G units)                                      |
| 820 cm <sup>-1</sup>  | C–H out of plane deformation (S units)                              |

**Table S3.** Assignment of main lignin and carbohydrates <sup>13</sup>C-<sup>1</sup>H correlation signals in the HSQC spectra of the untreated Kraft lignin and of resulting treated lignins with MtL and SiLA laccases.

| δ <sub>C</sub> /δ <sub>H</sub> (ppm) | Assignment                                                                                                                      |
|--------------------------------------|---------------------------------------------------------------------------------------------------------------------------------|
| 48.8/3.19                            | C <sub>β</sub> -H <sub>β</sub> , diresinol substructures ( <b>B''</b> )                                                         |
| 49.7/3.35                            | C <sub>β</sub> -H <sub>β</sub> , epiresinol substructures ( <b>B'</b> )                                                         |
| 51.9/3.4                             | C <sub>α</sub> -H <sub>α</sub> , α-5' condensed substructure ( <b>C</b> )                                                       |
| 53.8/3.05                            | C <sub>β</sub> -H <sub>β</sub> , resinol substructures ( <b>B</b> )                                                             |
| 54.0/2.82                            | C <sub>β</sub> -H <sub>β</sub> , epiresinol substructures ( <b>B'</b> )                                                         |
| 56.0/3.71                            | C–H, methoxyls ( <b>MeO</b> )                                                                                                   |
| 60.6/3.40–3.64                       | C <sub>γ</sub> -H <sub>γ</sub> , β-O-4' substructures ( <b>A</b> )                                                              |
| 61.8/4.12                            | C <sub>γ</sub> -H <sub>γ</sub> , cinnamyl alcohol end groups ( <b>I</b> )                                                       |
| 63.4/3.23–3.88                       | C <sub>5</sub> -H <sub>5</sub> , xylan                                                                                          |
| 63.6/3.10                            | C <sub>γ</sub> -H <sub>γ</sub> , aryl-glycerol ( <b>AG</b> )                                                                    |
| 69.3/3.30–3.70                       | C <sub>γ</sub> -H <sub>γ</sub> , epiresinol substructures ( <b>B'</b> )                                                         |
| 70.1/3.73–4.10                       | C <sub>γ</sub> -H <sub>γ</sub> , epiresinol substructures ( <b>B'</b> )                                                         |
| 71.3/3.77–4.16                       | C <sub>γ</sub> -H <sub>γ</sub> , resinol substructures ( <b>B</b> )                                                             |
| 72.3/4.87                            | C <sub>α</sub> -H <sub>α</sub> , β-O-4' S unit ( <b>A</b> )                                                                     |
| 73.0/3.08                            | C <sub>2</sub> -H <sub>2</sub> , xylan                                                                                          |
| 74.0/4.41                            | C <sub>α</sub> -H <sub>α</sub> , aryl-glycerol ( <b>AG</b> )                                                                    |
| 74.3/3.31                            | C <sub>3</sub> -H <sub>3</sub> , xylan                                                                                          |
| 74.3/4.43                            | C <sub>α</sub> -H <sub>α</sub> , Ar-CHOH-COOH units ( <b>F</b> )                                                                |
| 75.6/3.47                            | C <sub>β</sub> -H <sub>β</sub> aryl-glycerol ( <b>AG</b> )                                                                      |
| 75.9/3.52                            | C <sub>4</sub> -H <sub>4</sub> , xylan                                                                                          |
| 81.6/4.75                            | C <sub>α</sub> -H <sub>α</sub> , spirodienone substructures ( <b>E</b> )                                                        |
| 81.8/4.76                            | C <sub>α</sub> -H <sub>α</sub> , epiresinol substructures ( <b>B'</b> )                                                         |
| 85.5/4.76                            | C <sub>α'</sub> -H <sub>α'</sub> , spirodienone substructures ( <b>E</b> )                                                      |
| 85.3/4.63                            | C <sub>α</sub> -H <sub>α</sub> , resinol substructures ( <b>B</b> )                                                             |
| 87.5/4.30                            | C <sub>α</sub> -H <sub>α</sub> , epiresinol substructures ( <b>B'</b> )                                                         |
| 101.9/4.30                           | C-1, (1-4) β-D-Xylp                                                                                                             |
| 104.1/6.61                           | C <sub>2,6</sub> -H <sub>2,6</sub> , S units ( <b>S</b> )                                                                       |
| 103.9/6.83                           | C <sub>2,6</sub> -H <sub>2,6</sub> , 3,5-tetramethoxy- <i>para</i> -diphenol substructures ( <b>S<sub>1-1'</sub></b> )          |
| 105.0/6.9                            | C <sub>2,6</sub> -H <sub>2,6</sub> , <b>S<sub>1</sub>-G<sub>1'</sub></b> / <b>G<sub>5'</sub></b> substructures                  |
| 107.0/7.30                           | C <sub>2,6</sub> -H <sub>2,6</sub> , oxidized (H–C <sub>α</sub> =O or H <sub>3</sub> C–C <sub>α</sub> =O) S units ( <b>S'</b> ) |
| 110.8/6.90                           | C <sub>2</sub> -H <sub>2</sub> , G units ( <b>G</b> )                                                                           |
| 111.3/7.38                           | C <sub>2</sub> -H <sub>2</sub> , oxidized (H–C <sub>α</sub> =O) G units ( <b>G'</b> )                                           |
| 115.0/6.74                           | C <sub>3,5</sub> -H <sub>3,5</sub> , <i>p</i> -hydroxyphenyl ( <b>H</b> )                                                       |
| 115.1/6.40–6.80                      | C <sub>5</sub> -H <sub>5</sub> , G units ( <b>G</b> )                                                                           |
| 119.6/6.77                           | C <sub>6</sub> -H <sub>6</sub> , G units ( <b>G</b> )                                                                           |

---

|            |                                                                                                                |
|------------|----------------------------------------------------------------------------------------------------------------|
| 119.7/6.96 | C <sub>6</sub> -H <sub>6</sub> , 3-dimethoxy- <i>para</i> -diphenol substructures ( <b>G</b> <sub>1-1'</sub> ) |
| 120.3/7.24 | C <sub>β</sub> -H <sub>β</sub> , stilbene ( <b>SB</b> <sub>5β</sub> )                                          |
| 123.4/7.51 | C <sub>6</sub> -H <sub>6</sub> , oxidized (H <sub>3</sub> C-C <sub>α</sub> =O) G units ( <b>G</b> '')          |
| 126.4/6.98 | C <sub>α</sub> -H <sub>α</sub> , stilbene ( <b>SB</b> <sub>1α</sub> )                                          |
| 126.8/7.41 | C <sub>6</sub> -H <sub>6</sub> , oxidized (H-C <sub>α</sub> =O) G units ( <b>G</b> ')                          |

---
